# Supplementary material for: Bond Strength of Universal Adhesives to Dentin: A Systematic Review and Meta-Analysis
Source: PubMed Central journal article supplement (PMC7961712; doi:10.3390/polym13050814), 2021-03-07
Supplement: polymers-13-00814-s001.pdf [file polymers-13-00814-s001.pdf]

**Table S1.** Search strategy used in ISI Web of Science.

| <b>Search strategy</b> |                                                                                                                                                                                                                                                                                                                                                   |
|------------------------|---------------------------------------------------------------------------------------------------------------------------------------------------------------------------------------------------------------------------------------------------------------------------------------------------------------------------------------------------|
| <b># 1</b>             | ALL= (Universal adhesives OR Universal adhesive OR Universal simplified adhesive systems OR Universal Dental Adhesives OR Multipurpose adhesives OR multi-purpose adhesives OR multimode adhesives OR multi-mode adhesives OR universal bonding agent OR multi purpose adhesives OR multi mode adhesives)                                         |
| <b># 2</b>             | ALL= (Bond OR Bonding OR dental bonding OR Bonding efficacy OR bond strength OR Bonding performance OR bonding effectiveness OR Bond performance OR adhesive properties OR microtensile strength OR Micro-tensile strength OR bonding properties OR Microtensile bond strength OR shear bond strength OR microshear bond strength OR Performance) |
| <b># 3</b>             | ALL= (dentin or dentine)                                                                                                                                                                                                                                                                                                                          |
| <b># 4</b>             | #1 and #2 and #3                                                                                                                                                                                                                                                                                                                                  |

**Table S2.** Search strategy used in SCOPUS.

| <b>Search strategy</b> |                                                                                                                                                                                                                                                                                                                                                                                                                                                                                                                                                                                                                                                                                                                                                   |
|------------------------|---------------------------------------------------------------------------------------------------------------------------------------------------------------------------------------------------------------------------------------------------------------------------------------------------------------------------------------------------------------------------------------------------------------------------------------------------------------------------------------------------------------------------------------------------------------------------------------------------------------------------------------------------------------------------------------------------------------------------------------------------|
| <b># 1</b>             | ALL ("Universal adhesives" OR "Universal adhesive" OR "Universal simplified adhesive systems" OR "Universal Dental Adhesives" OR "Multipurpose adhesives" OR "multi-purpose adhesives" OR "multimode adhesives" OR "multi-mode adhesives" OR "universal bonding agent" OR "multi purpose adhesives" OR "multi mode adhesives") AND ALL("Bond" OR "Bonding" OR "dental bonding" OR "Bonding efficacy" OR "bond strength" OR "Bonding performance" OR "bonding effectiveness" OR "Bond performance" OR "adhesive properties" OR "microtensile strength" OR "Micro-tensile strength" OR "bonding properties" OR "Microtensile bond strength" OR "shear bond strength" OR "microshear bond strength" OR "Performance") AND ALL("dentin" or "dentine") |

**Table S3.** Search strategy used in EMBASE.

| <b>Search strategy</b> |                                                                                                                                                                                                                                                                                                                                                                            |
|------------------------|----------------------------------------------------------------------------------------------------------------------------------------------------------------------------------------------------------------------------------------------------------------------------------------------------------------------------------------------------------------------------|
| <b># 1</b>             | 'universal adhesives' OR 'universal adhesive' OR 'universal simplified adhesive systems' OR 'universal dental adhesives' OR 'multipurpose adhesives' OR 'multi-purpose adhesives' OR 'multimode adhesives' OR 'multi-mode adhesives' OR 'universal bonding agent' OR 'multi purpose adhesives' OR 'multi mode adhesives'                                                   |
| <b>#2</b>              | 'bond' OR 'bonding' OR 'dental bonding' OR 'bonding efficacy' OR 'bond strength' OR 'bonding performance' OR 'bonding effectiveness' OR 'bond performance' OR 'adhesive properties' OR 'microtensile strength' OR 'micro-tensile strength' OR 'bonding properties' OR 'microtensile bond strength' OR 'shear bond strength' OR 'microshear bond strength' OR 'performance' |
| <b>#3</b>              | 'dentin' OR 'dentine'                                                                                                                                                                                                                                                                                                                                                      |
| <b>#4</b>              | #1 and #2 and #3                                                                                                                                                                                                                                                                                                                                                           |

**Table S4.** Excluded studies

| <b>Study</b>      | <b>Reason for exclusion</b>                                           |
|-------------------|-----------------------------------------------------------------------|
| Al Deeb, 2020     | Universal adhesive was not evaluated                                  |
| Anja, 2015        | Universal adhesive was not evaluated.                                 |
| Alaghehmand, 2016 | Universal adhesive was not evaluated                                  |
| Cardenas, 2018    | Universal adhesive was not evaluated                                  |
| Chiang, 2013      | Universal adhesive was not evaluated                                  |
| De Alencar, 2014  | Universal adhesive was not evaluated                                  |
| Deng, 2016        | Universal adhesive was not evaluated                                  |
| Devarajan, 2020   | Universal adhesive was not evaluated                                  |
| Feiz, 2017        | Universal adhesive was not evaluated                                  |
| Gu, 2019          | Universal adhesive was not evaluated (experimental adhesive was used) |
| Shahabi, 2013     | Universal adhesive was not evaluated                                  |
| Yan, 2018         | Universal adhesive was not evaluated                                  |
| De Siqueira, 2020 | Universal adhesive was not used using any additional technique.       |
| Sinjari, 2020     | Universal adhesive was not used using any additional technique.       |
| Lee, 2013         | Universal adhesive was not used using any additional technique.       |
| Khatib, 2020      | Adhesive used could not be identified.                                |
| Martini, 2017     | Sclerotic dentin was used as a bonding substrate                      |
| Zumstein, 2018    | Eroded dentin was used as a bonding substrate                         |
| Santos, 2017      | Full-text could not be retrieved                                      |
| Tsujimoto, 2017   | Full-text could not be retrieved                                      |
| Ouchi, 2020       | Bovine dentin was used as a bonding substrate                         |
| Poggio, 2017      | Bovine dentin was used as a bonding substrate                         |
| Tamura, 2017      | Bovine dentin was used as a bonding substrate                         |
| Santos, 2016      | Bovine dentin was used as a bonding substrate                         |
| Şişmanoglu, 2019  | Bovine dentin was used as a bonding substrate                         |
| Souza, 2018       | Bovine dentin was used as a bonding substrate                         |
| Ayar, 2016        | Bovine dentin was used as a bonding substrate                         |
| Moritake, 2018    | Bovine dentin was used as a bonding substrate                         |
| Saito, 2020       | Bovine dentin was used as a bonding substrate                         |
| Da Rosa, 2018     | Bovine dentin was used as a bonding substrate                         |
| Tsujimoto, 2016   | Bovine dentin was used as a bonding substrate                         |
